# Supplementary material
Source: PubMed Central journal article supplement (PMC3494239)
Supplement: supp_M031245_jlr.M031245-1.pdf [file supp_M031245_jlr.M031245-1.pdf]

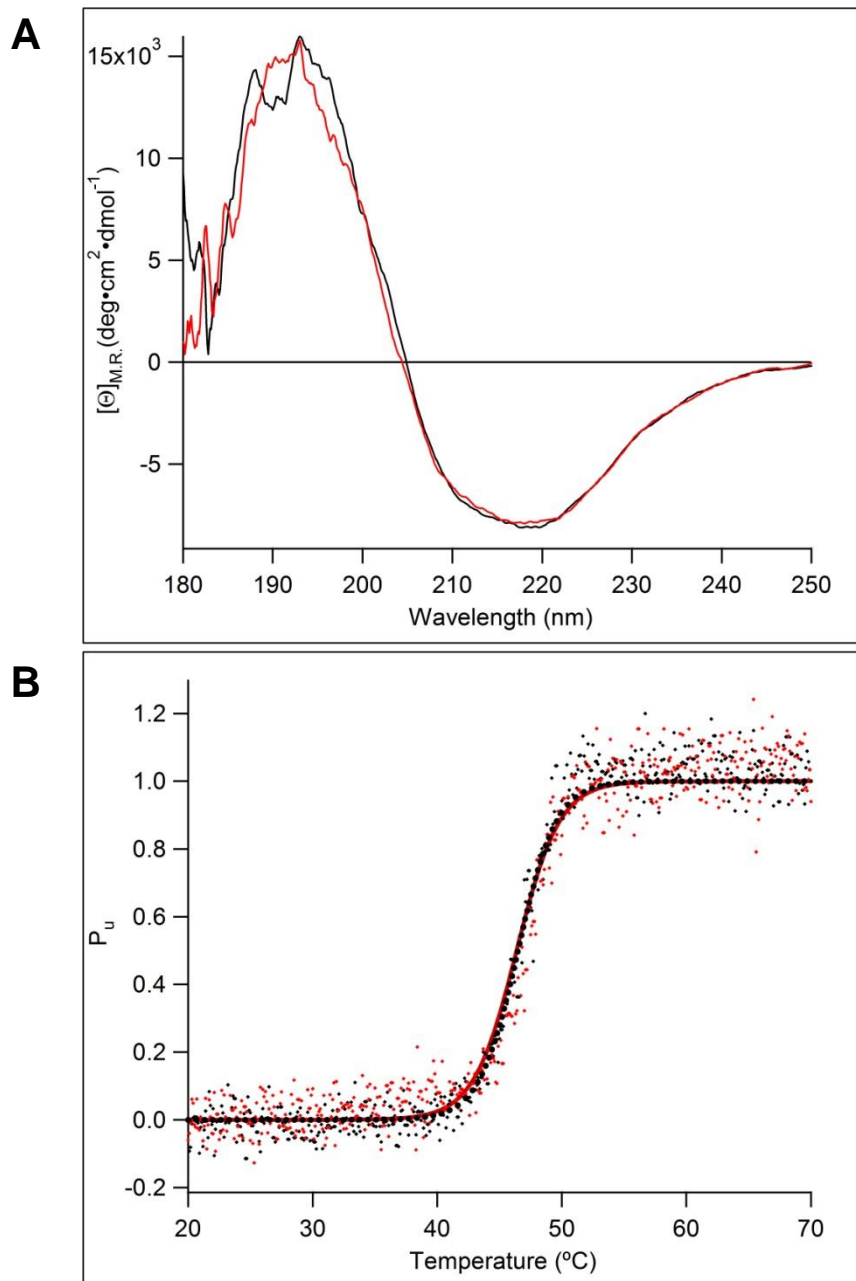

**Figure S1: Far-UV CD spectrum and temperature denaturation monitored by CD of STARD5 in presence of 1:1 cholesterol. (a)** Far-UV CD spectra of apo-STARD5 (black) and STARD5 with cholesterol at 1:1 molar ratio (red) **(b)** Temperature-dependence of the population of unfolded state ( $P_u$ ); black: apo-STARD5 and red: STARD5 with cholesterol at 1:1 molar ratio. The concentration of STARD5 and cholesterol were 10  $\mu\text{M}$  in sodium phosphate buffer 10 mM at pH 7.4. Cholesterol was added as described in Roostae et al. (1)

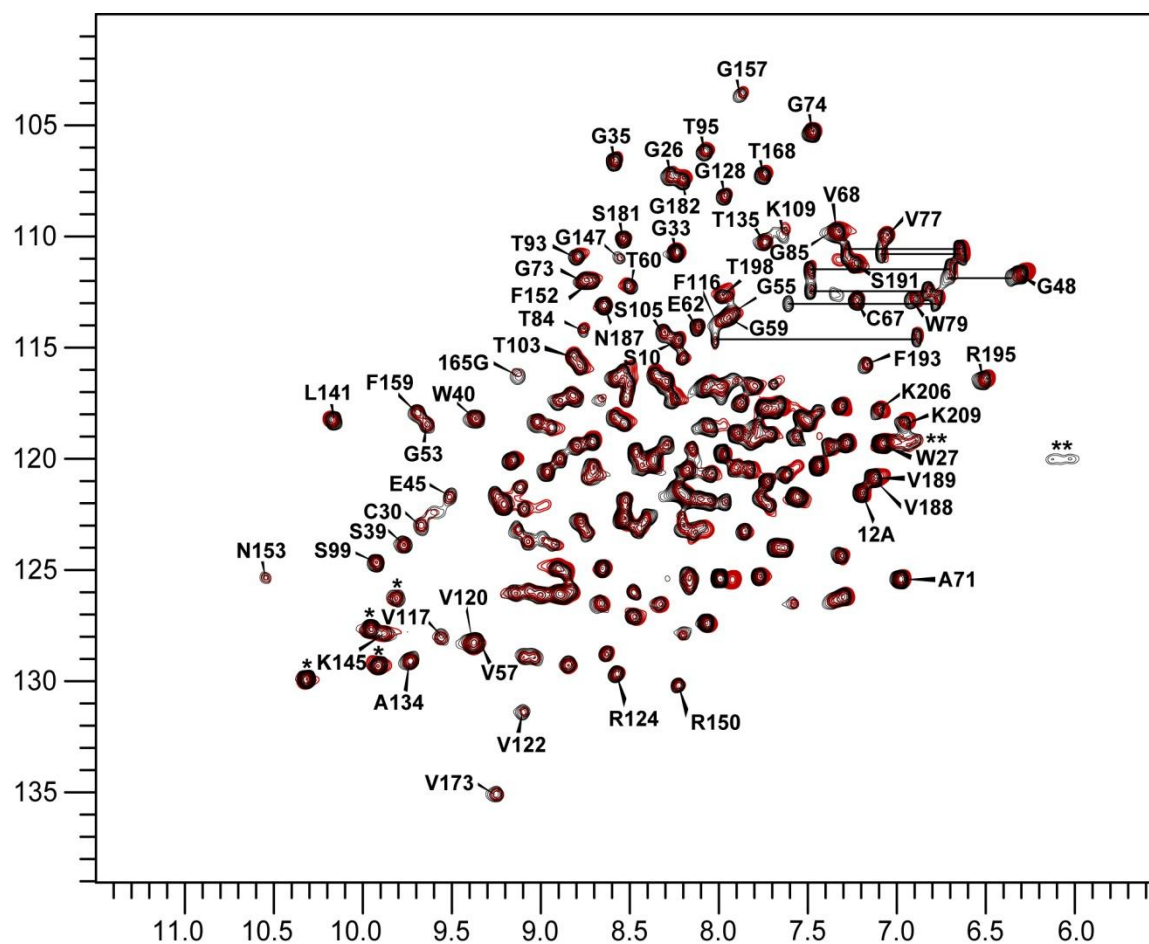

**Figure S2: Binding assay of cholesterol to STARD5 by NMR.** Overlain of  $^1\text{H}$ - $^{15}\text{N}$  HSQC spectra of STARD5 alone (black) and in the presence (red) of soluble cholesterol (in complex with methyl- $\beta$ -cyclodextrin). Assignments of the cross-peaks are given with the residue number and one-letter code for amino acids. Horizontal lines connect the side-chain resonances of asparagines and glutamines. Tryptophan side-chain indole NH cross-peaks are marked with an asterisk (\*). The double asterisks (\*\*) denote protected guanidino ( $\text{H}\eta$ ) protons from arginine side-chains. STARD5 was preincubated with methyl- $\beta$ -cyclodextrin (black), then soluble cholesterol (cholesterol complexed with methyl- $\beta$ -cyclodextrin) (red) was used in a 2:1 ratio of cholesterol:StAR. The complex was left at room temperature for 1 hour to reach equilibrium before data acquisition. STARD5 alone (black) shows a good peak dispersion indicating a well-

folded protein. After the addition of cholesterol (red), there are no chemical shift displacements as observed for STARD1 (2).

## REFERENCES

1. Roostae, A., E. Barbar, J. G. Lehoux, and P. Lavigne. 2008. Cholesterol binding is a prerequisite for the activity of the steroidogenic acute regulatory protein (StAR). *Biochem J* **412**: 553-562.
2. Barbar, E., J. G. Lehoux, and P. Lavigne. 2009. Toward the NMR structure of StAR. *Mol Cell Endocrinol* **300**: 89-93.
